# Supplementary material for: The Prognostic Significance of FKBP1A and Its Related Immune Infiltration in Liver Hepatocellular Carcinoma
Source: MDPI journal article supplement (doi:10.3390/ijms232112797), 2022-10-24
Supplement: s1 [file s1]

**Supplementary Table S1. Expression levels of *FKBP1A* in HCCDB database**

| Dataset | P-value     | Type      | Nums | Mean  | STD    | IQR    |
|---------|-------------|-----------|------|-------|--------|--------|
| HCCDB1  | 0.000001070 | HCC       | 100  | 11.34 | 0.3667 | 0.4914 |
|         |             | Adjacent  | 97   | 11.10 | 0.3168 | 0.3249 |
| HCCDB3  | 0.0001361   | HCC       | 268  | 7.896 | 1.791  | 2.210  |
|         |             | Adjacent  | 243  | 7.311 | 1.644  | 1.835  |
|         |             | Cirrhotic | 40   | 10.23 | 1.665  | 1.871  |
|         |             | Healthy   | 6    | 6.262 | 0.2864 | 0.4250 |
| HCCDB4  | 4.570e-31   | HCC       | 240  | 8.183 | 0.6289 | 0.9086 |
|         |             | Adjacent  | 193  | 7.536 | 0.4386 | 0.5385 |
| HCCDB6  | 1.390e-24   | HCC       | 225  | 6.447 | 0.6841 | 0.9070 |
|         |             | Adjacent  | 220  | 5.824 | 0.5076 | 0.6724 |
| HCCDB7  | 0.03196     | HCC       | 80   | 14.12 | 0.5324 | 0.7195 |
|         |             | Adjacent  | 82   | 13.93 | 0.5670 | 0.8197 |
| HCCDB11 | 0.06864     | HCC       | 88   | 8.013 | 0.5790 | 0.5815 |
|         |             | Adjacent  | 48   | 8.260 | 0.8235 | 0.7188 |
| HCCDB12 | 0.00001900  | HCC       | 81   | 7.966 | 0.4326 | 0.6260 |
|         |             | Adjacent  | 80   | 7.692 | 0.3512 | 0.4174 |
| HCCDB13 | 0.2174      | HCC       | 228  | 5.860 | 0.9144 | 1.029  |
|         |             | Adjacent  | 168  | 5.726 | 0.7040 | 0.9128 |
| HCCDB15 | 9.180e-18   | HCC       | 351  | 11.84 | 0.5789 | 0.7500 |
|         |             | Adjacent  | 49   | 11.33 | 0.2762 | 0.4200 |
| HCCDB16 | 9.020e-9    | HCC       | 60   | 9.202 | 0.3315 | 0.3739 |
|         |             | Adjacent  | 60   | 8.857 | 0.2765 | 0.3266 |
| HCCDB17 | 3.500e-10   | HCC       | 115  | 9.109 | 0.4034 | 0.6050 |
|         |             | Adjacent  | 52   | 8.661 | 0.3780 | 0.4300 |
| HCCDB18 | 3.000e-39   | HCC       | 212  | 6.092 | 0.5949 | 0.7875 |
|         |             | Adjacent  | 177  | 5.292 | 0.4774 | 0.4800 |

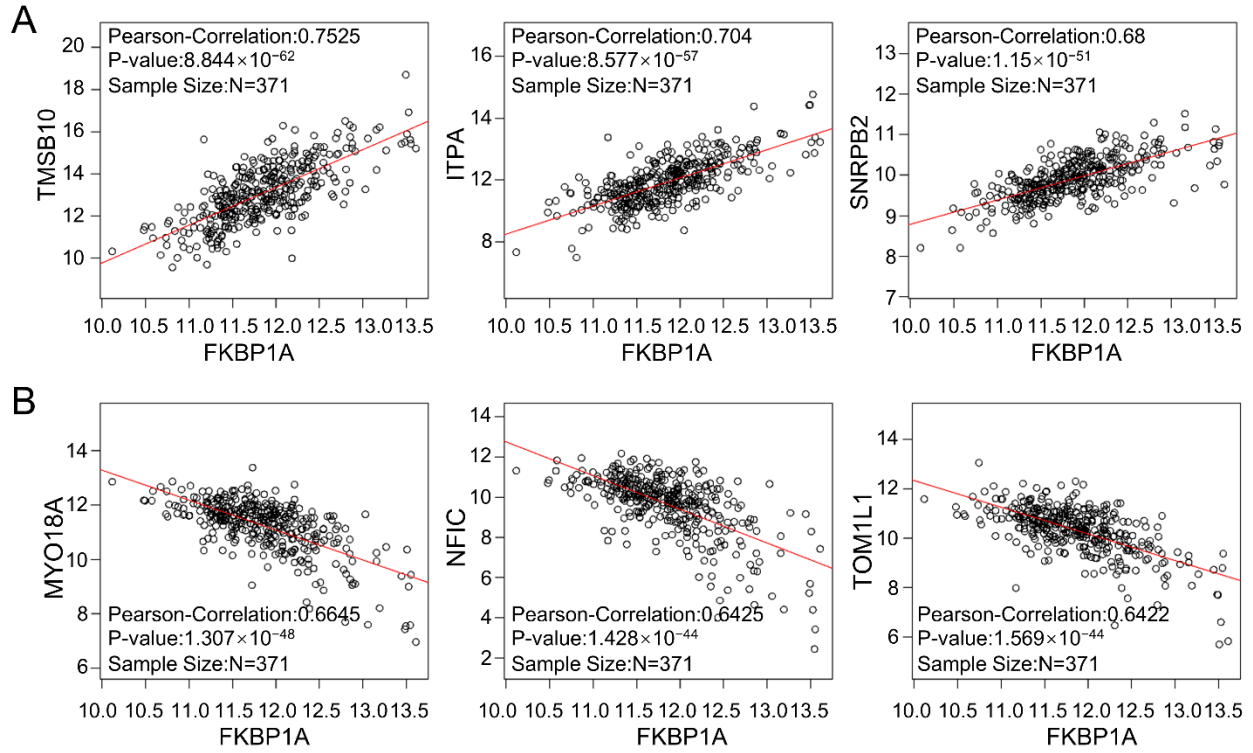

**Supplementary Figure S1.** The top3 co-expression genes with *FKBP1A* were analyzed in LIHC from the LinkedOmics database. (A-B) The scatter plot shows the Pearson correlation of *FKBP1A* expression with the top3 positively correlated genes (A) and negatively correlated genes (B) in LIHC.

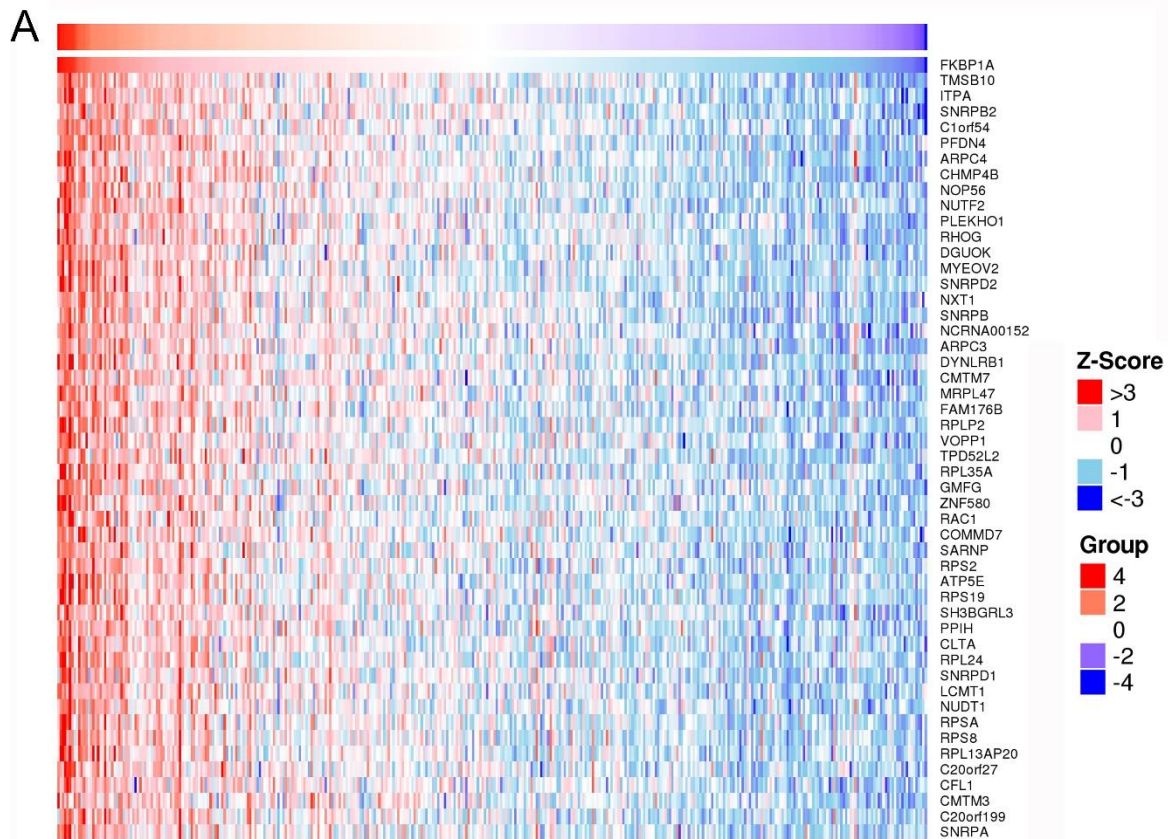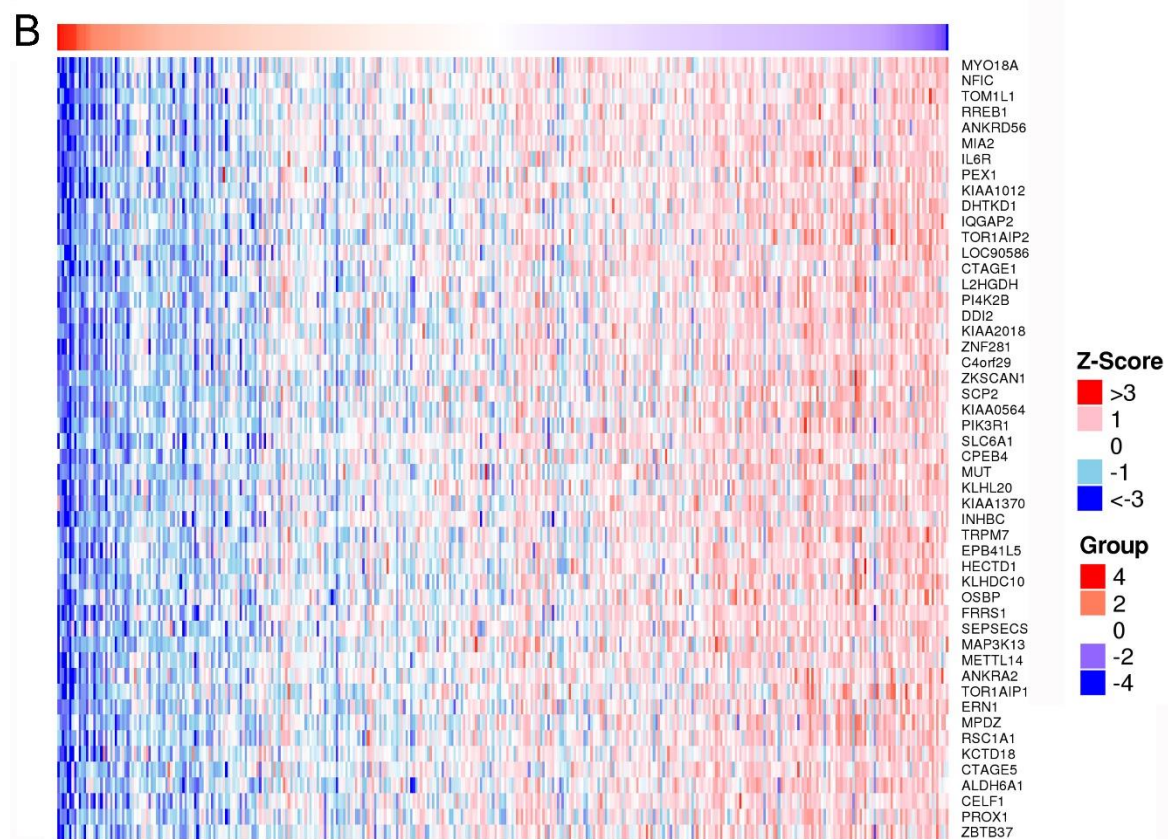

**Supplementary Figure S2.** Top 50 genes related to *FKBP1A* in LIHC are shown in heatmaps from the LinkedOmics database. (A-B) Heat maps showing top 50 genes positively (A) and negatively (B) correlated with *FKBP1A*. Red indicates positively correlated genes and blue indicates negatively correlated genes.

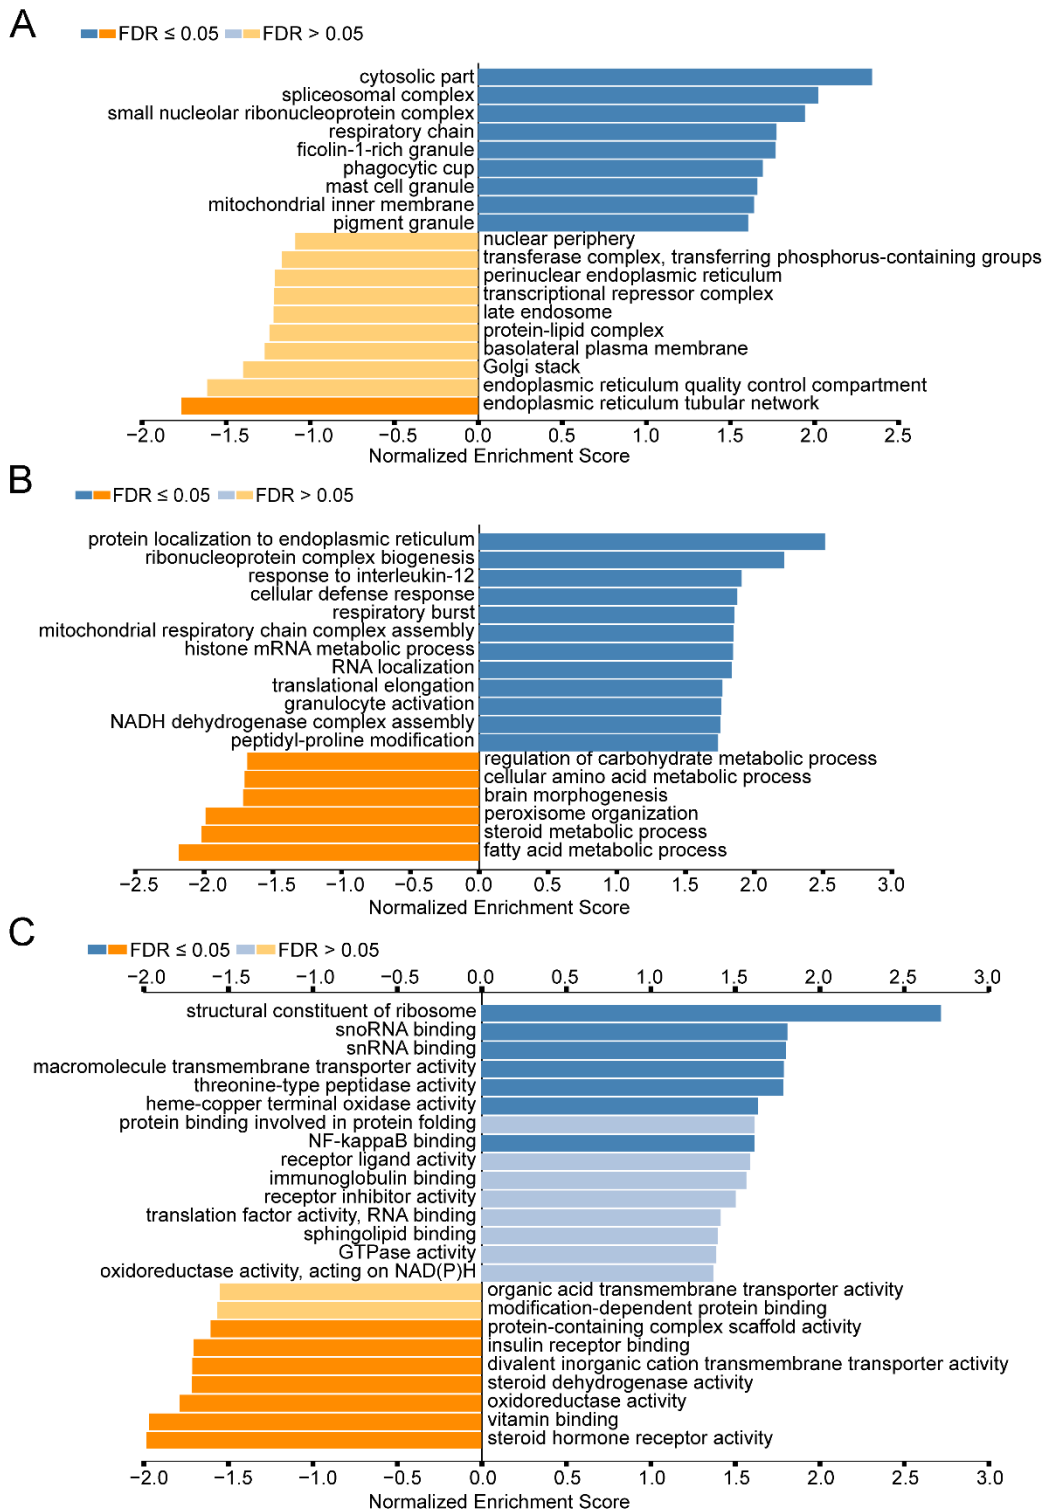

**Supplementary Figure S3.** The significantly enriched GO annotations of genes co-expressed with *FKBP1A* were analyzed using gene set enrichment analysis by LinkedOmics database. (A) Cellular components. (B) Biological processes. (C) Molecular functions. FDR, false discovery rate. The x-axis represents the normalized enrichment score, and the y-axis represents the term of GO. GO, Gene Ontology; FDR, false discovery rate.

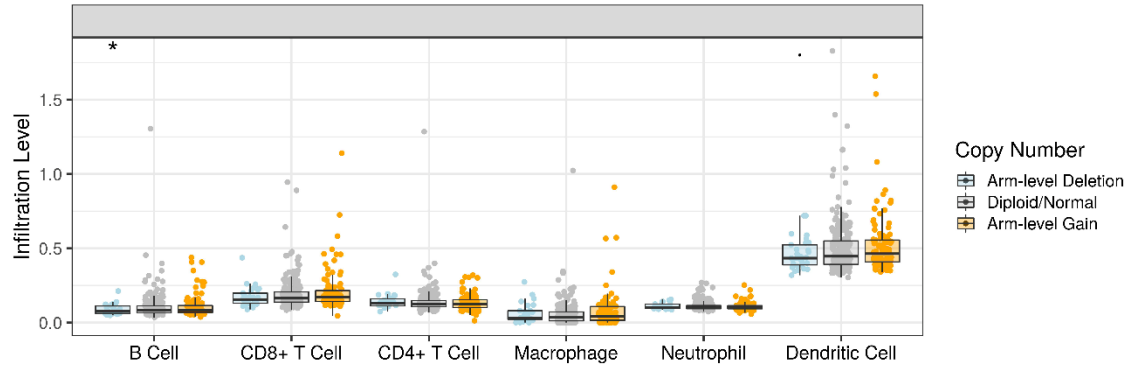

**Supplementary Figure S4.** The infiltration level of various immune cells under somatic copy number alterations of *FKBP1A* in LIHC.  $*p < 0.05$ .

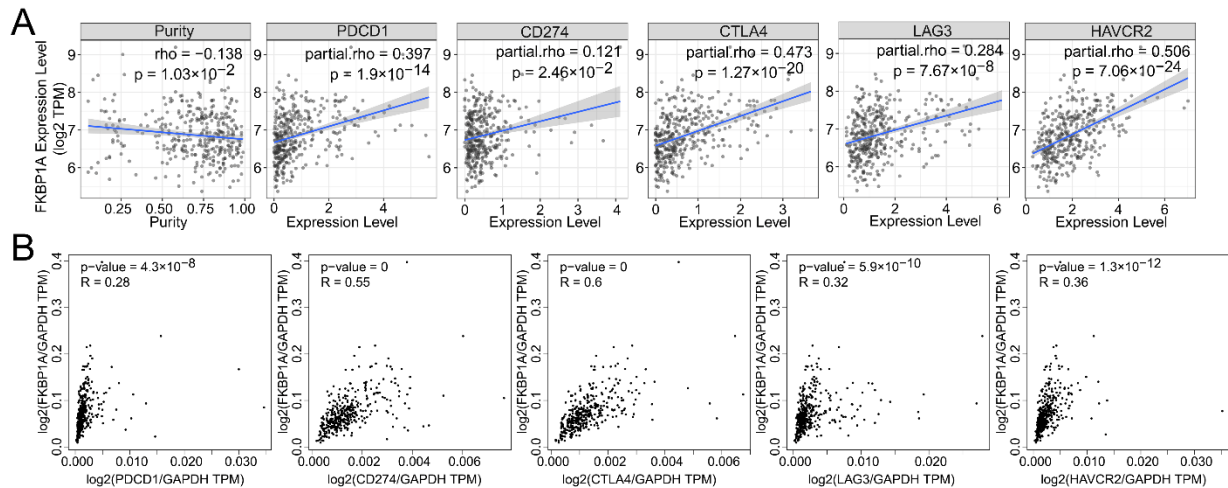

**Supplementary Figure S5.** Correlation of *FKBP1A* expression with *PD-1*, *PD-L1*, *CTLA-4*, *LAG3* and *HAVCR2* expression in LIHC. (A) Spearman correlation of *FKBP1A* with expression of *PD-1*, *PD-L1*, *CTLA-4*, *LAG3* and *HAVCR2* in LIHC adjusted by tumor purity using TIMER2.0. (B) The expression correlation of *FKBP1A* with expression of *PD-1*, *PD-L1*, *CTLA-4*, *LAG3* and *HAVCR2* in LIHC determined by GEPIA database.
